# Supplementary material for: Precise control over reduction potential of fulleropyrrolidines for organic photovoltaic materials
Source: Royal Society of Chemistry journal article supplement (doi:10.1039/c6ra27661j), 2017-01-01
Supplement: c6ra27661j1.pdf [file c6ra27661j1.pdf]

## Electronic Supplementary Information

### Precise control over reduction potential of fulleropyrrolidines for organic photovoltaic materials

M. Karakawa, T. Nagai, K. Adachi, Y. Ie, Y. Aso

Fig. S1 illustrates the advantages of the Prato reaction including the ease of synthesis and scale up, without the need for a metal catalyst.

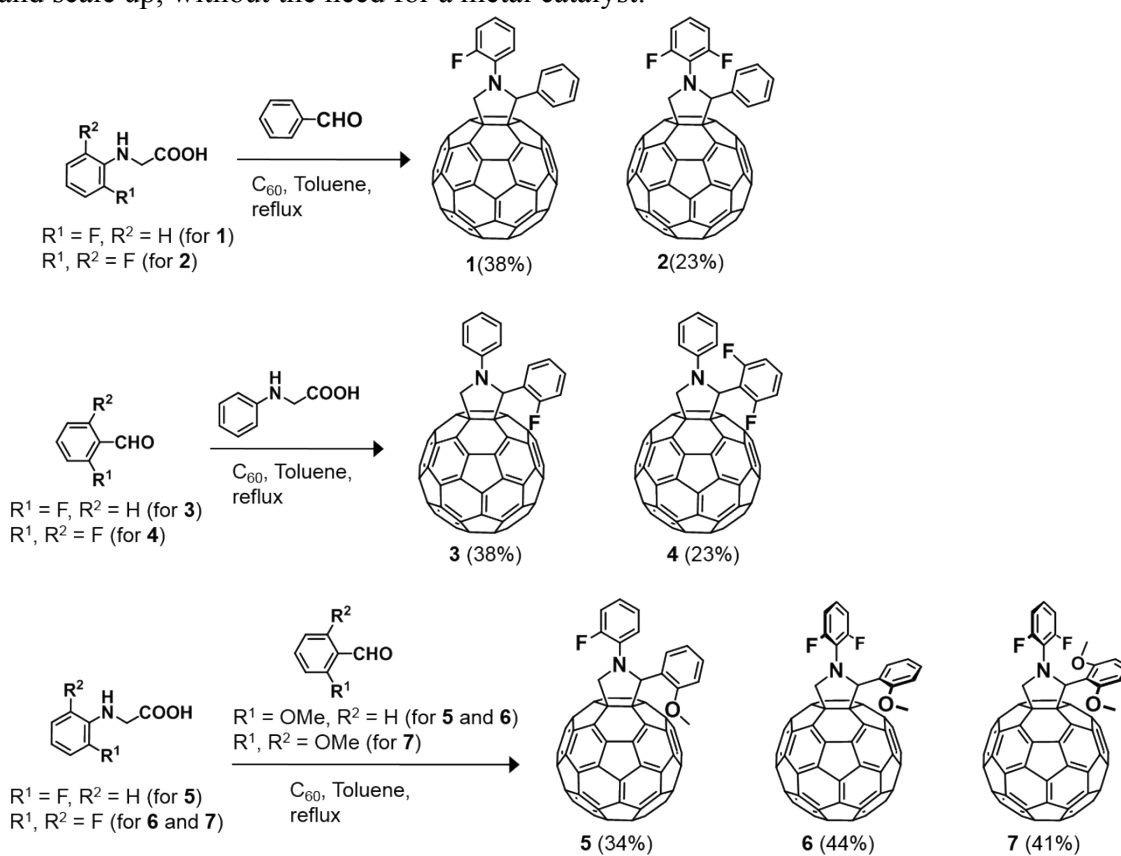

Fig. S1. Synthetic procedure for fulleropyrrolidine derivatives.

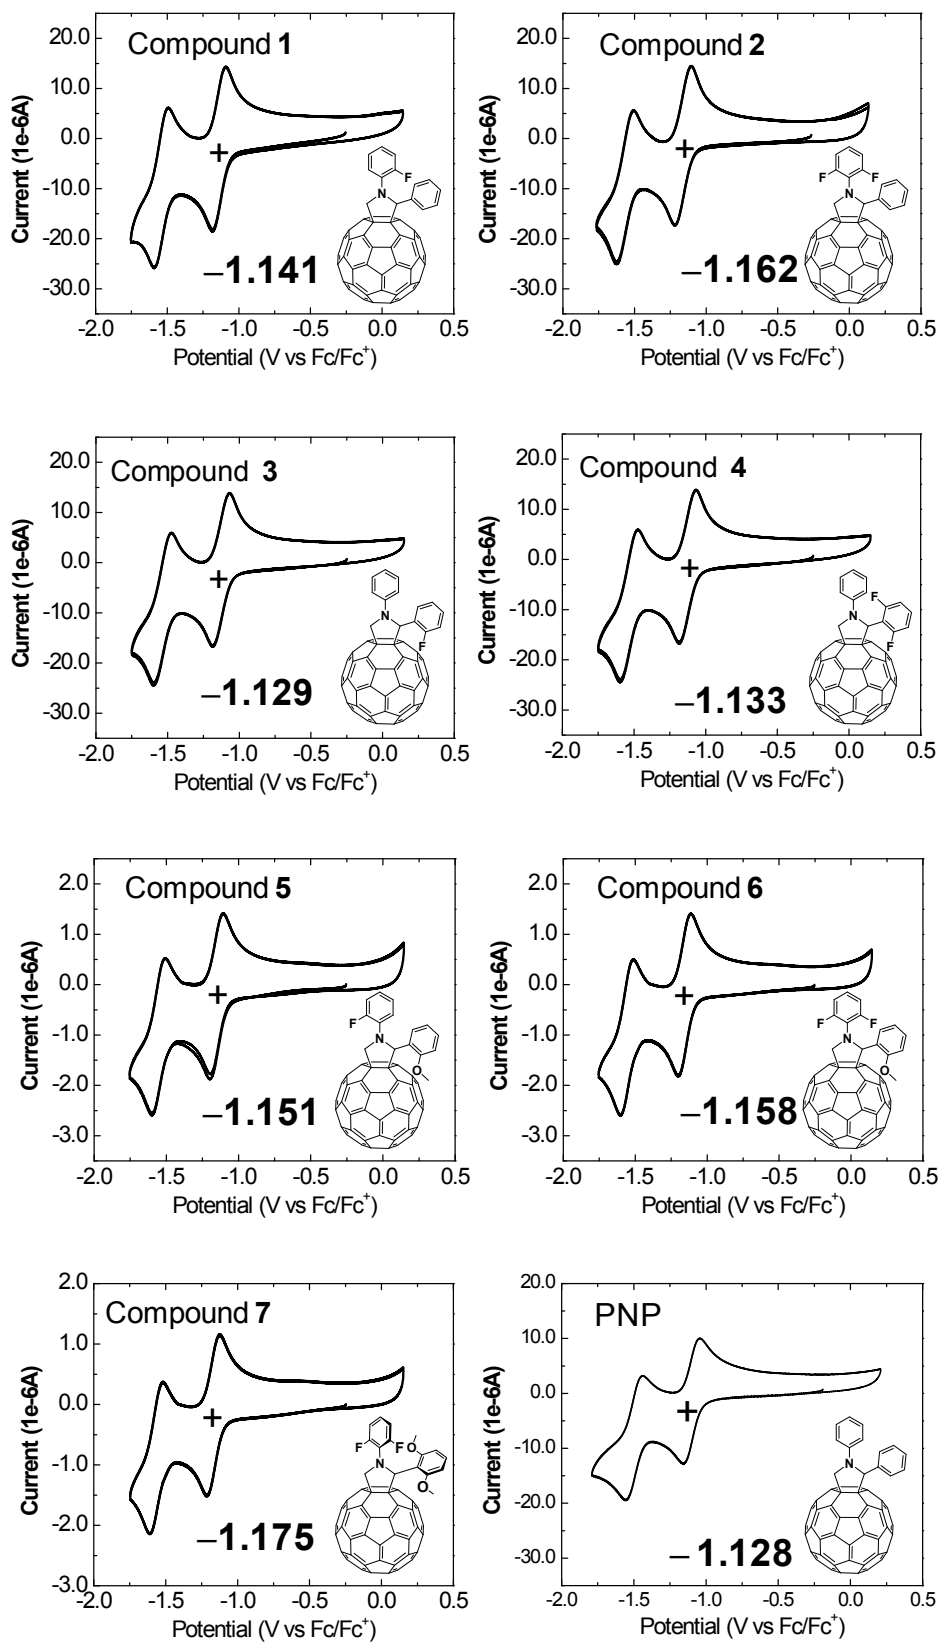

Fig. S2. Cyclic voltammograms of fulleropyrrolidine derivatives, 1–7 and PNP.

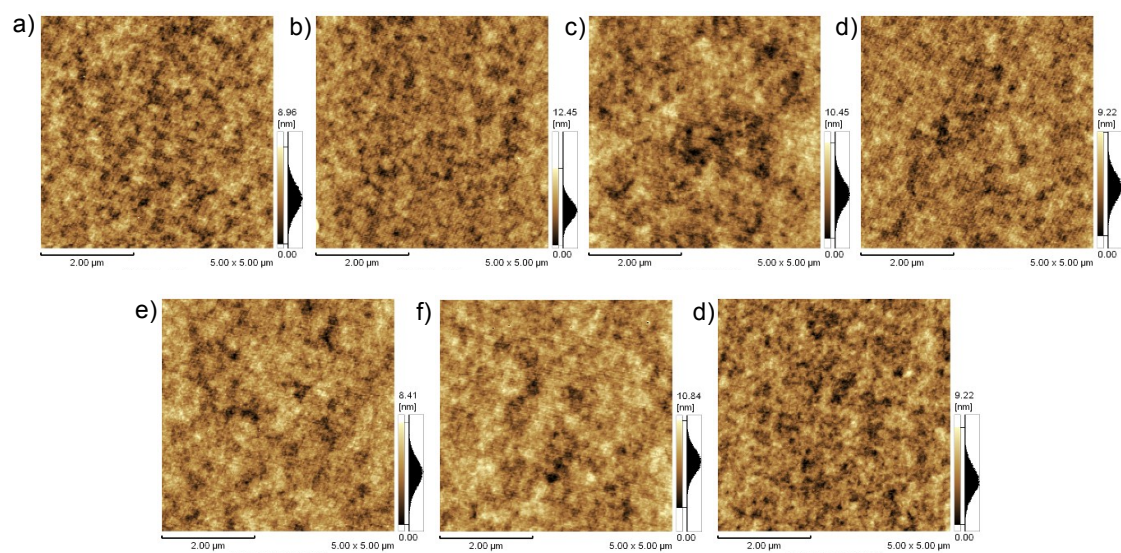

**Fig. S3.** Film surface morphology for OPV cells (PTB7:fulleropyrrolidine), a) 1, b) 2, c) 3, d) 4, e) 5, f) 6 and d) 7

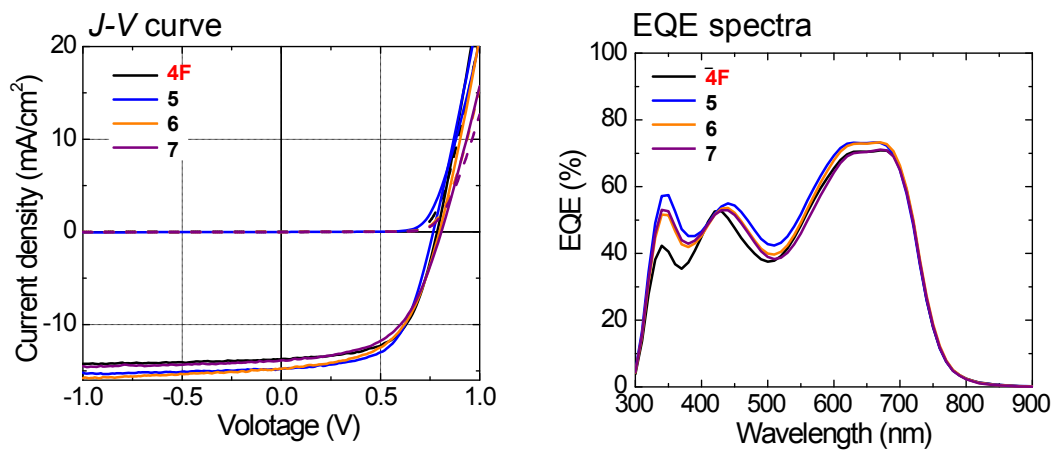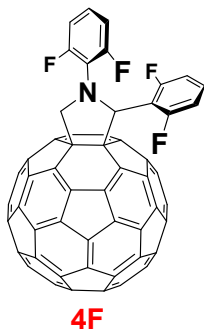

|                                   | PTB7: <b>4F</b>         | PTB7: <b>5</b>          | PTB7: <b>6</b>                   | PTB7: <b>7</b>          |
|-----------------------------------|-------------------------|-------------------------|----------------------------------|-------------------------|
| $J_{sc}$<br>(mA/cm <sup>2</sup> ) | 13.717<br>(13.985)      | 14.758<br>(14.493)      | 14.104<br>(14.105)               | 13.875<br>(13.552)      |
| $V_{oc}$ (V)                      | <b>0.786</b><br>(0.780) | <b>0.766</b><br>(0.768) | <b>0.792</b><br>( <b>0.795</b> ) | <b>0.807</b><br>(0.809) |
| $FF$                              | 0.600<br>(0.582)        | 0.598<br>(0.593)        | 0.654<br>(0.629)                 | 0.545<br>(0.538)        |
| PCE (%)                           | 6.53<br>(6.33)          | 6.76<br>(6.59)          | 7.30<br>(7.05)                   | 6.10<br>(5.90)          |

Average values are in parentheses.

Figure 4.  $J$ - $V$  curves and EQE spectra of compound 4F with 5, 6 and 7.
